# Supplementary material for: Public Health Implications of Household Water Sources in the Kumasi Metropolis, Ghana. A Case Study
Source: Research Square preprint supplement (doi:10.21203/rs.3.rs-3203831/v1), 2023-08-01
Supplement: Supplementary file 1 [file 4d12765d87b2a8e52a9ad334.xlsx]

## Sheet: Sheet1
TABLE 9 HAZARD QUOTIENT VIA INGESTION
	ADULTS							CHILDREN
Sample	As	Cd	Cr	Hg	Ni	Pb	Se	Cd	Cr	Hg	Mn	Ni	Pb		PUBLIC HEALTH IMPLICATIONS OF HOUSEHOLD WATER SOURCES IN THE KUMASI METROPOLIS, GHANA. A CASE STUDY
S1	0.0305	0.00548	0.00169	0.0022	0.0014	0.000825	0.00888	0.0116	0.00359	0.00466	-0.00217	0.00296	0.00175		Awewomom Jonathan,1 Michael Yaw Peasah,1 Agyei Gyasi Yaw,3 Takyi Yaw Duodu,2 Sampson Achagwe Antwi,4 Ayisi-Larbi Stephen,1 Opoku Adomako Kwabena5 Francis Opoku,1 Osei Akoto1*
S2	0.000739	0.00859	0.00411	0.0022	0.00282	0.00161	0.0374	0.0182	0.00872	0.00467	0.0107	0.00599	0.00341		Environmental Geochemistry and Health
S3	0.000881	0.00911	0.000384	5.58e-05	0.000932	0.00705	0.0204	0.0193	0.000815	0.000118	0.00249	0.00198	0.0149
S4	-0.000155	0.00913	0.0625	-0.000974	0.0114	0.00194	0.0142	0.0194	0.133	-0.00207	0.00839	0.0242	0.00412
S5	0.00539	0.0139	-0.000595	0.000735	0.00412	0.0144	0.0209	0.0294	-0.00126	0.00156	0.0296	0.00873	0.0306
S6	0.000241	0.0108	0.000434	-0.000171	0.000497	0.00937	0.0126	0.0228	0.000921	-0.000363	0.00403	0.00105	0.0199
S7	7.52e-05	0.0241	0.00126	0.00443	0.0228	0.00414	0.0133	0.051	0.00268	0.00939	0.105	0.0483	0.00879
S8	0.000389	0.0237	0.00261	0.000827	0.0106	0.0793	0.0208	0.0503	0.00554	0.00176	0.0142	0.0225	0.168
S9	-0.000406	0.0136	0.0013	-0.000844	0.00176	0.0135	0.0169	0.0288	0.00276	-0.00179	0.0309	0.00373	0.0287
S10	0.000229	0.0273	-0.000598	-0.000862	0.00434	0.0487	0.0101	0.058	-0.00127	-0.00183	0.0409	0.00922	0.103
S11	0.00301	0.0141	0.00114	-0.000726	0.000573	0.0101	0.0185	0.0298	0.00242	-0.00154	0.00273	0.00121	0.0213
S12	-0.00141	0.016	-0.00103	0.000742	0.00153	0.0194	0.0149	0.0338	-0.00219	0.00157	0.019	0.00324	0.0411
S13	0.00111	0.0143	0.00302	0.000758	0.00219	0.00266	0.0281	0.0302	0.00641	0.00161	0.0103	0.00464	0.00564
S14	0.00247	0.0166	0.00279	0.000411	0.00186	0.0273	0.0173	0.0353	0.00592	0.000872	0.0128	0.00395	0.0578
S15	0.000268	0.0234	0.000725	-0.000286	0.00301	0.029	0.0255	0.0497	0.00154	-0.000607	0.0275	0.00638	0.0615
S16	0.00178	0.0236	0.00693	0.00111	0.0337	0.00588	0.0295	0.05	0.0147	0.00236	0.421	0.0714	0.0125
S17	-0.00185	0.0342	-0.000117	-0.00114	0.0169	0.283	0.0247	0.0726	-0.000248	-0.00242	0.0204	0.0358	0.601
S18	0.00176	0.0155	-0.00114	-0.00115	0.000602	0.00918	0.0178	0.0329	-0.00241	-0.00245	0.0149	0.00128	0.0195
S19	0.00156	0.0119	0.00514	0.00163	0.00278	0.0042	0.0181	0.0253	0.0109	0.00346	0.03	0.00589	0.00891
S20	0.00413	0.0135	0.00205	-0.00104	0.00188	0.0378	0.0211	0.0285	0.00436	-0.00221	0.0242	0.00398	0.0802
S21	-0.00111	0.0138	-0.000484	-0.00062	0.00103	0.0248	0.00754	0.0292	-0.00103	-0.00132	0.00721	0.00218	0.0526
S22	0.0034	0.0152	-0.00144	0.000759	0.0128	0.00663	0.011	0.0322	-0.00306	0.00161	0.0514	0.0271	0.0141
S23	0.00755	0.016	0.0177	-0.000501	0.01	0.0185	0.0175	0.0339	0.0375	-0.00106	0.0198	0.0213	0.0392
TABLE 10 DERMAL HAZARD QUOTIENT IN ADULTS AND CHILDREN(mg/kg-day)
	ADULTS							CHILDREN
Sample	As	Cd	Cr	Hg	Ni	Pb	Se	As	Cu	Cr	Hg	Mn	Ni	Pb	Se
S1	0.00589	0.0026	0.000803	0.000149	3.31e-05	2.68e-06	9.58e-05	0.0174	3.82e-05	0.00237	0.00044	-0.000358	9.77e-05	7.92e-06	0.000283
S2	0.000143	0.00408	0.00195	0.000149	6.7e-05	5.22e-06	0.000403	0.000421	2.94e-05	0.00576	0.00044	0.00177	0.000198	1.54e-05	0.00119
S3	0.00017	0.00432	0.000182	3.79e-06	2.21e-05	2.29e-05	0.00022	0.000501	0.000326	0.000538	1.12e-05	0.000411	6.52e-05	6.76e-05	0.000649
S4	-2.99e-05	0.00433	0.0297	-6.6e-05	0.00027	6.33e-06	0.000153	-8.82e-05	0.000176	0.0876	-0.000195	0.00138	0.000797	1.87e-05	0.000452
S5	0.00104	0.00659	-0.000282	4.98e-05	9.76e-05	4.7e-05	0.000225	0.00307	0.000195	-0.000833	0.000147	0.00488	0.000288	0.000139	0.000665
S6	4.65e-05	0.0051	0.000206	-1.16e-05	1.18e-05	3.05e-05	0.000136	0.000137	0.000611	0.000608	-3.42e-05	0.000665	3.48e-05	8.99e-05	0.000402
S7	1.45e-05	0.0114	0.000599	0.0003	0.000541	1.35e-05	0.000144	4.28e-05	0.00022	0.00177	0.000885	0.0173	0.0016	3.98e-05	0.000424
S8	7.5e-05	0.0112	0.00124	5.61e-05	0.000252	0.000258	0.000224	0.000221	0.00549	0.00365	0.000165	0.00235	0.000743	0.000761	0.000661
S9	-7.84e-05	0.00645	0.000617	-5.72e-05	4.17e-05	4.4e-05	0.000182	-0.000231	9.35e-05	0.00182	-0.000169	0.00509	0.000123	0.00013	0.000538
S10	4.41e-05	0.013	-0.000284	-5.84e-05	0.000103	0.000158	0.000109	0.00013	0.00424	-0.000837	-0.000172	0.00674	0.000304	0.000468	0.00032
S11	0.00058	0.00667	0.00054	-4.92e-05	1.36e-05	3.27e-05	0.000199	0.00171	0.000526	0.00159	-0.000145	0.00045	4.01e-05	9.65e-05	0.000587
S12	-0.000272	0.00757	-0.00049	5.03e-05	3.62e-05	6.3e-05	0.000161	-0.000802	0.000928	-0.00145	0.000148	0.00314	0.000107	0.000186	0.000475
S13	0.000215	0.00676	0.00143	5.14e-05	5.2e-05	8.65e-06	0.000303	0.000634	3.13e-05	0.00423	0.000152	0.00171	0.000153	2.55e-05	0.000893
S14	0.000477	0.0079	0.00132	2.79e-05	4.42e-05	8.87e-05	0.000186	0.00141	0.000376	0.00391	8.22e-05	0.00211	0.000131	0.000262	0.00055
S15	5.17e-05	0.0111	0.000344	-1.94e-05	7.13e-05	9.44e-05	0.000274	0.000153	0.00428	0.00101	-5.73e-05	0.00454	0.00021	0.000278	0.00081
S16	0.000343	0.0112	0.00329	7.55e-05	0.000799	1.91e-05	0.000318	0.00101	0.00038	0.0097	0.000223	0.0695	0.00236	5.64e-05	0.000939
S17	-0.000356	0.0162	-5.55e-05	-7.73e-05	0.000401	0.000922	0.000266	-0.00105	0.0607	-0.000164	-0.000228	0.00337	0.00118	0.00272	0.000785
S18	0.00034	0.00735	-0.00054	-7.82e-05	1.43e-05	2.99e-05	0.000192	0.001	0.000492	-0.00159	-0.000231	0.00245	4.21e-05	8.81e-05	0.000565
S19	0.0003	0.00567	0.00244	0.000111	6.59e-05	1.37e-05	0.000195	0.000885	0.000112	0.00719	0.000326	0.00496	0.000195	4.03e-05	0.000575
S20	0.000797	0.00638	0.000974	-7.06e-05	4.45e-05	0.000123	0.000228	0.00235	0.0029	0.00287	-0.000208	0.00399	0.000131	0.000363	0.000673
S21	-0.000214	0.00654	-0.000229	-4.21e-05	2.44e-05	8.06e-05	8.14e-05	-0.00063	0.0012	-0.000677	-0.000124	0.00119	7.2e-05	0.000238	0.00024
S22	0.000656	0.00721	-0.000685	5.15e-05	0.000303	2.16e-05	0.000119	0.00194	0.000881	-0.00202	0.000152	0.00848	0.000893	6.36e-05	0.000352
S23	0.00146	0.00759	0.00839	-3.4e-05	0.000238	6.01e-05	0.000188	0.0043	0.000646	0.0248	-0.0001	0.00327	0.000702	0.000177	0.000556
	TABLE 11 HAZARD INDEX (HI)
		INGESTION		DERMAL
	Sample	ADULTS	CHILDREN	ADULTS	CHILDREN
	MB	0.0268	0.0568	0.00303	0.00894
	S1	0.0508	0.108	0.00946	0.0279
	S2	0.0631	0.134	0.0074	0.0218
	S3	0.047	0.0997	0.00519	0.0153
	S4	0.106	0.224	0.0349	0.103
	S5	0.077	0.163	0.00949	0.028
	S6	0.0487	0.103	0.00596	0.0176
	S7	0.124	0.263	0.019	0.0559
	S8	0.262	0.557	0.016	0.0472
	S9	0.0624	0.132	0.00896	0.0264
	S10	0.199	0.423	0.0168	0.0495
	S11	0.0591	0.125	0.00832	0.0245
	S12	0.0789	0.167	0.0085	0.0251
	S13	0.0576	0.122	0.00942	0.0278
	S14	0.0828	0.176	0.0109	0.0321
	S15	0.186	0.395	0.0149	0.044
	S16	0.309	0.656	0.0397	0.117
	S17	1.67	3.53	0.0391	0.115
	S18	0.0601	0.127	0.00831	0.0245
	S19	0.0619	0.131	0.0105	0.031
	S20	0.153	0.325	0.0108	0.0319
	S21	0.0741	0.157	0.00705	0.0208
	S22	0.0914	0.194	0.0108	0.032
	S23	0.11	0.233	0.0192	0.0567
TABLE 12 DERMAL AND ORAL LIKELY CANCER RISK
	DERMAL								INGESTION
	ADULTS				CHILDREN				ADULTS					CHILDREN
Sample Id	As 75	Cd 111	Ni 60	Pb 208	Cd 111	Cr 52	Ni 60	Pb 208	As 75	Cd 111	Cr 52	Ni 60	Pb 208	As 75	Cd 111	Cr 52	Ni 60	Pb 208
S1	2.65e-06	4.94e-07	6.03e-07	1.2e-10	1.46e-06	3.55e-06	1.78e-06	3.53e-10	0.000229	1.04e-06	2.54e-06	2.54e-05	2.52e-08	0.000485	2.21e-06	5.39e-06	5.39e-05	5.35e-08
S2	6.42e-08	7.74e-07	1.22e-06	2.33e-10	2.28e-06	8.63e-06	3.6e-06	6.88e-10	5.54e-06	1.63e-06	6.17e-06	5.14e-05	4.91e-08	1.18e-05	3.46e-06	1.31e-05	0.000109	1.04e-07
S3	7.65e-08	8.21e-07	4.02e-07	1.02e-09	2.42e-06	8.07e-07	1.19e-06	3.02e-09	6.61e-06	1.73e-06	5.77e-07	1.7e-05	2.16e-07	1.4e-05	3.67e-06	1.22e-06	3.6e-05	4.57e-07
S4	-1.35e-08	8.23e-07	4.92e-06	2.82e-10	2.43e-06	0.000131	1.45e-05	8.33e-10	-1.16e-06	1.74e-06	9.38e-05	0.000207	5.95e-08	-2.47e-06	3.68e-06	0.000199	0.00044	1.26e-07
S5	4.68e-07	1.25e-06	1.78e-06	2.1e-09	3.69e-06	-1.25e-06	5.24e-06	6.19e-09	4.04e-05	2.64e-06	-8.92e-07	7.49e-05	4.42e-07	8.58e-05	5.6e-06	-1.89e-06	0.000159	9.37e-07
S6	2.09e-08	9.7e-07	2.15e-07	1.36e-09	2.86e-06	9.12e-07	6.33e-07	4.01e-09	1.81e-06	2.04e-06	6.51e-07	9.04e-06	2.87e-07	3.84e-06	4.33e-06	1.38e-06	1.92e-05	6.08e-07
S7	6.53e-09	2.17e-06	9.84e-06	6.02e-10	6.4e-06	2.65e-06	2.9e-05	1.77e-09	5.64e-07	4.57e-06	1.89e-06	0.000415	1.27e-07	1.2e-06	9.7e-06	4.01e-06	0.00088	2.69e-07
S8	3.38e-08	2.14e-06	4.59e-06	1.15e-08	6.3e-06	5.48e-06	1.35e-05	3.4e-08	2.92e-06	4.5e-06	3.92e-06	0.000193	2.43e-06	6.19e-06	9.55e-06	8.31e-06	0.00041	5.15e-06
S9	-3.53e-08	1.23e-06	7.6e-07	1.96e-09	3.62e-06	2.73e-06	2.24e-06	5.79e-09	-3.05e-06	2.58e-06	1.95e-06	3.2e-05	4.14e-07	-6.46e-06	5.48e-06	4.14e-06	6.79e-05	8.77e-07
S10	1.99e-08	2.47e-06	1.88e-06	7.07e-09	7.27e-06	-1.26e-06	5.53e-06	2.09e-08	1.72e-06	5.19e-06	-8.97e-07	7.91e-05	1.49e-06	3.64e-06	1.1e-05	-1.9e-06	0.000168	3.16e-06
S11	2.61e-07	1.27e-06	2.47e-07	1.46e-09	3.74e-06	2.39e-06	7.29e-07	4.31e-09	2.25e-05	2.67e-06	1.71e-06	1.04e-05	3.08e-07	4.78e-05	5.67e-06	3.62e-06	2.21e-05	6.53e-07
S12	-1.22e-07	1.44e-06	6.59e-07	2.81e-09	4.24e-06	-2.17e-06	1.94e-06	8.3e-09	-1.06e-05	3.03e-06	-1.55e-06	2.78e-05	5.93e-07	-2.24e-05	6.43e-06	-3.28e-06	5.89e-05	1.26e-06
S13	9.67e-08	1.29e-06	9.46e-07	3.86e-10	3.79e-06	6.34e-06	2.79e-06	1.14e-09	8.35e-06	2.71e-06	4.53e-06	3.99e-05	8.13e-08	1.77e-05	5.74e-06	9.61e-06	8.45e-05	1.73e-07
S14	2.15e-07	1.5e-06	8.05e-07	3.96e-09	4.43e-06	5.86e-06	2.38e-06	1.17e-08	1.85e-05	3.16e-06	4.19e-06	3.39e-05	8.34e-07	3.93e-05	6.71e-06	8.88e-06	7.2e-05	1.77e-06
S15	2.33e-08	2.11e-06	1.3e-06	4.21e-09	6.23e-06	1.52e-06	3.83e-06	1.24e-08	2.01e-06	4.45e-06	1.09e-06	5.47e-05	8.87e-07	4.27e-06	9.45e-06	2.31e-06	0.000116	1.88e-06
S16	1.54e-07	2.12e-06	1.45e-05	8.53e-10	6.27e-06	1.45e-05	4.29e-05	2.52e-09	1.33e-05	4.48e-06	1.04e-05	0.000613	1.8e-07	2.83e-05	9.5e-06	2.2e-05	0.0013	3.81e-07
S17	-1.6e-07	3.09e-06	7.3e-06	4.11e-08	9.11e-06	-2.46e-07	2.15e-05	1.21e-07	-1.39e-05	6.51e-06	-1.75e-07	0.000307	8.67e-06	-2.94e-05	1.38e-05	-3.72e-07	0.000652	1.84e-05
S18	1.53e-07	1.4e-06	2.6e-07	1.33e-09	4.12e-06	-2.39e-06	7.67e-07	3.93e-09	1.32e-05	2.94e-06	-1.71e-06	1.1e-05	2.81e-07	2.8e-05	6.24e-06	-3.62e-06	2.32e-05	5.96e-07
S19	1.35e-07	1.08e-06	1.2e-06	6.1e-10	3.18e-06	1.08e-05	3.54e-06	1.8e-09	1.17e-05	2.27e-06	7.71e-06	5.06e-05	1.29e-07	2.47e-05	4.81e-06	1.64e-05	0.000107	2.73e-07
S20	3.59e-07	1.21e-06	8.1e-07	5.49e-09	3.58e-06	4.31e-06	2.39e-06	1.62e-08	3.1e-05	2.56e-06	3.08e-06	3.41e-05	1.16e-06	6.58e-05	5.42e-06	6.53e-06	7.24e-05	2.45e-06
S21	-9.61e-08	1.24e-06	4.44e-07	3.6e-09	3.67e-06	-1.02e-06	1.31e-06	1.06e-08	-8.31e-06	2.62e-06	-7.25e-07	1.87e-05	7.58e-07	-1.76e-05	5.56e-06	-1.54e-06	3.97e-05	1.61e-06
S22	2.95e-07	1.37e-06	5.51e-06	9.62e-10	4.04e-06	-3.03e-06	1.63e-05	2.84e-09	2.55e-05	2.89e-06	-2.17e-06	0.000232	2.03e-07	5.41e-05	6.12e-06	-4.59e-06	0.000493	4.3e-07
S23	6.56e-07	1.44e-06	4.33e-06	2.68e-09	4.25e-06	3.71e-05	1.28e-05	7.91e-09	5.66e-05	3.04e-06	2.65e-05	0.000182	5.65e-07	0.00012	6.44e-06	5.63e-05	0.000387	1.2e-06
	TABLE 13 TOTAL CANCER RISK
		INGESTION		DERMAL
	Sample	ADULTS	CHILDREN	ADULTS	CHILDREN
	MB	4.77e-05	0.000101	2.98e-06	8.78e-06					0.0003		0.000123
	S1	0.000258	0.000547	4.95e-06	1.46e-05					0.0005		0.014
	S2	6.48e-05	0.000137	4.98e-06	1.47e-05					0.003		5e-06
	S3	2.61e-05	5.53e-05	1.57e-06	4.65e-06					0.2		0.012
	S4	0.000302	0.00064	5.02e-05	0.000148					0.04		6e-05
	S5	0.000118	0.000249	3.08e-06	9.07e-06					0.003		2.1e-05
	S6	1.38e-05	2.93e-05	1.52e-06	4.47e-06					0.2		0.00184
	S7	0.000422	0.000895	1.29e-05	3.81e-05					0.046		0.0008
	S8	0.000207	0.000439	8.63e-06	2.54e-05					0.2		0.00053
	S9	3.39e-05	7.2e-05	2.88e-06	8.49e-06					0.0036		22
	S10	8.66e-05	0.000184	3.94e-06	1.16e-05					0.005		0.12
	S11	3.77e-05	7.99e-05	2.59e-06	7.64e-06					0.6		0.06
	S12	1.93e-05	4.09e-05	1.24e-06	3.67e-06					0.3
	S13	5.55e-05	0.000118	4.48e-06	1.32e-05
	S14	6.07e-05	0.000129	4.51e-06	1.33e-05
	S15	6.32e-05	0.000134	3.96e-06	1.17e-05
	S16	0.000641	0.00136	2.18e-05	6.42e-05
	S17	0.000309	0.000655	1.02e-05	3e-05
	S18	2.57e-05	5.45e-05	1e-06	2.95e-06
	S19	7.23e-05	0.000153	6.07e-06	1.79e-05
	S20	7.19e-05	0.000153	3.85e-06	1.14e-05
	S21	1.31e-05	2.77e-05	1.25e-06	3.69e-06
	S22	0.000259	0.000549	6.15e-06	1.81e-05
	S23	0.000269	0.000571	1.9e-05	5.61e-05
